# Supplementary material for: Proteomic analysis of rhein-induced cyt: ER stress mediates cell death in breast cancer cells
Source: Royal Society of Chemistry journal article supplement (doi:10.1039/c4mb00451e), 2014-09-22
Supplement: c4mb00451e1.pdf [file c4mb00451e1.pdf]

# B

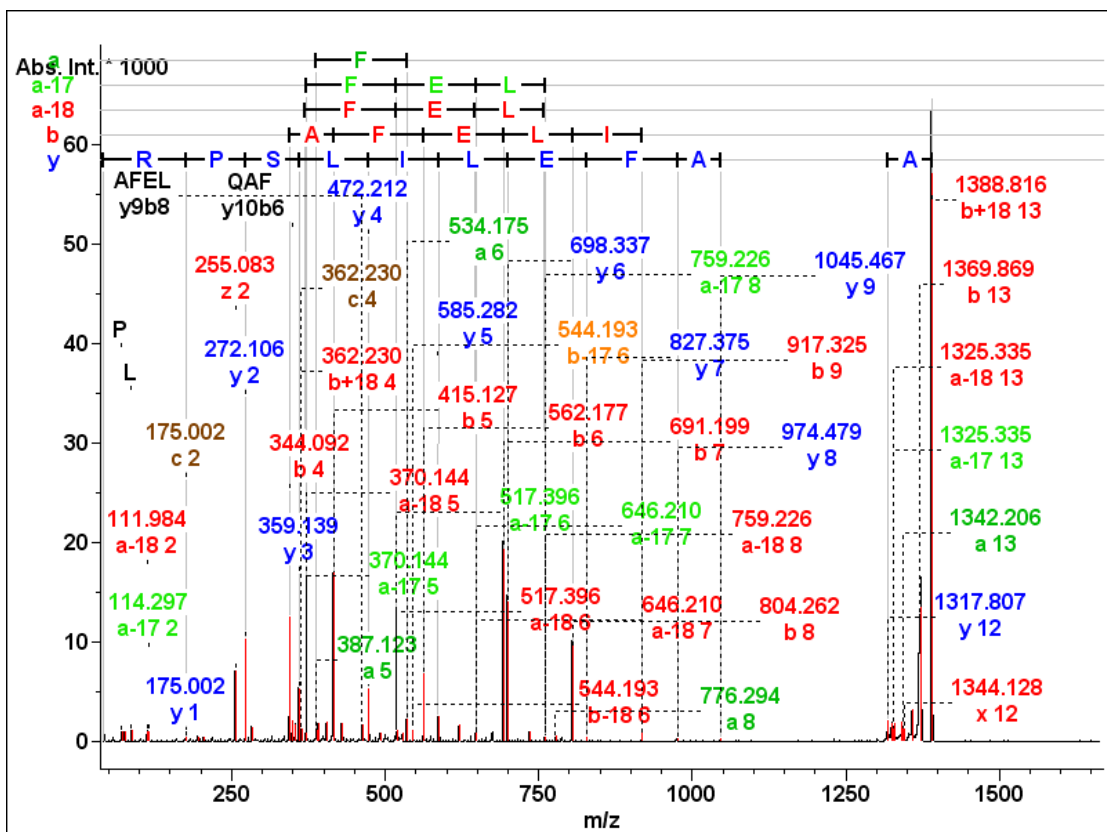

## Supplementary Figure 1

C

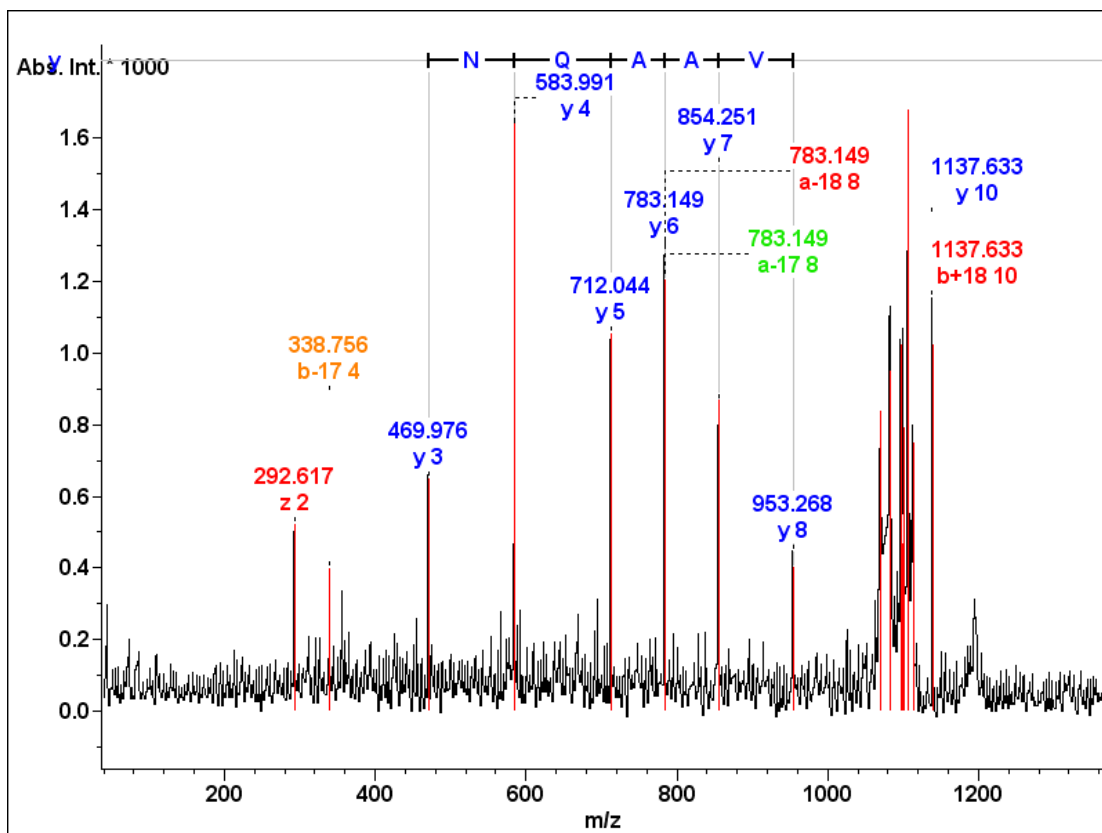

D

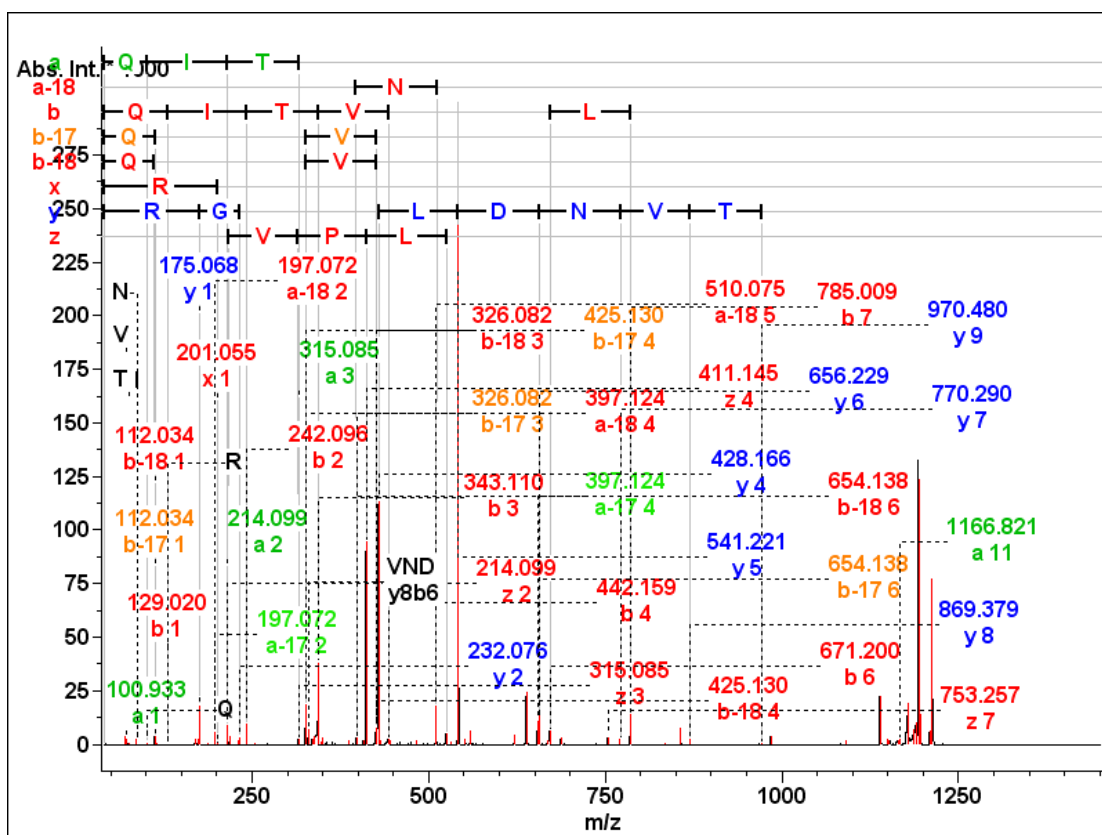

E

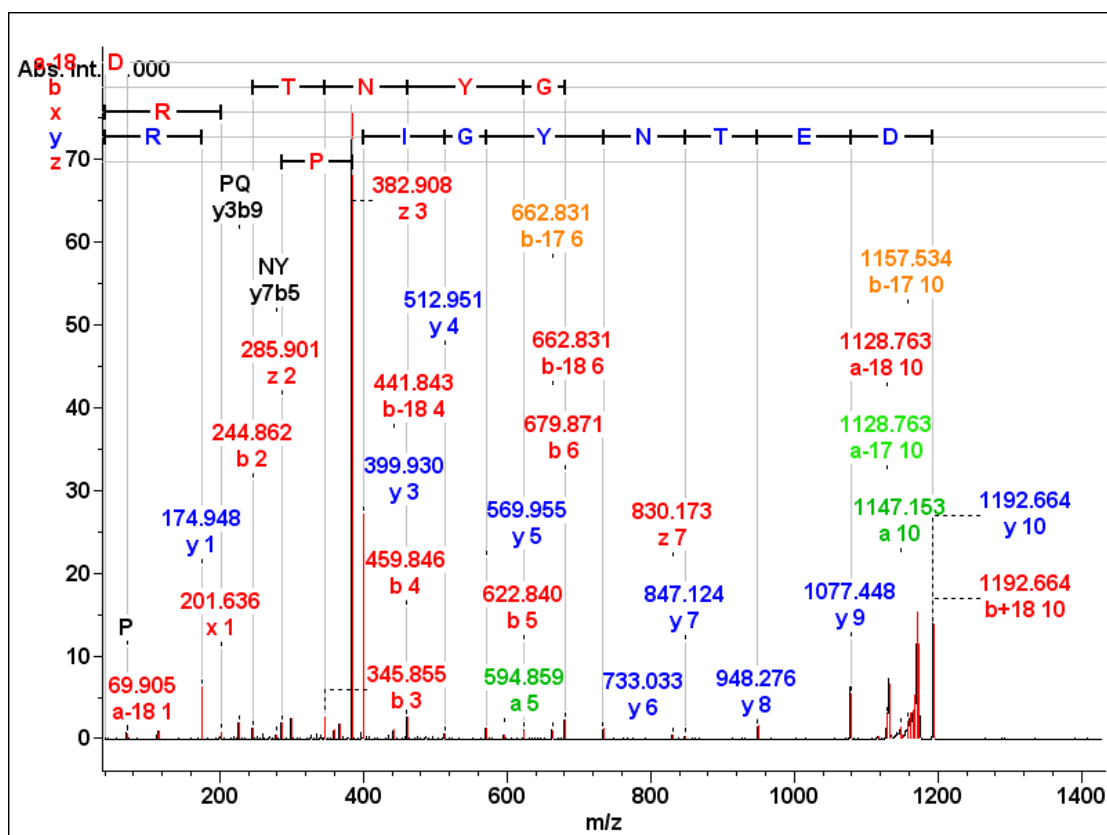

F

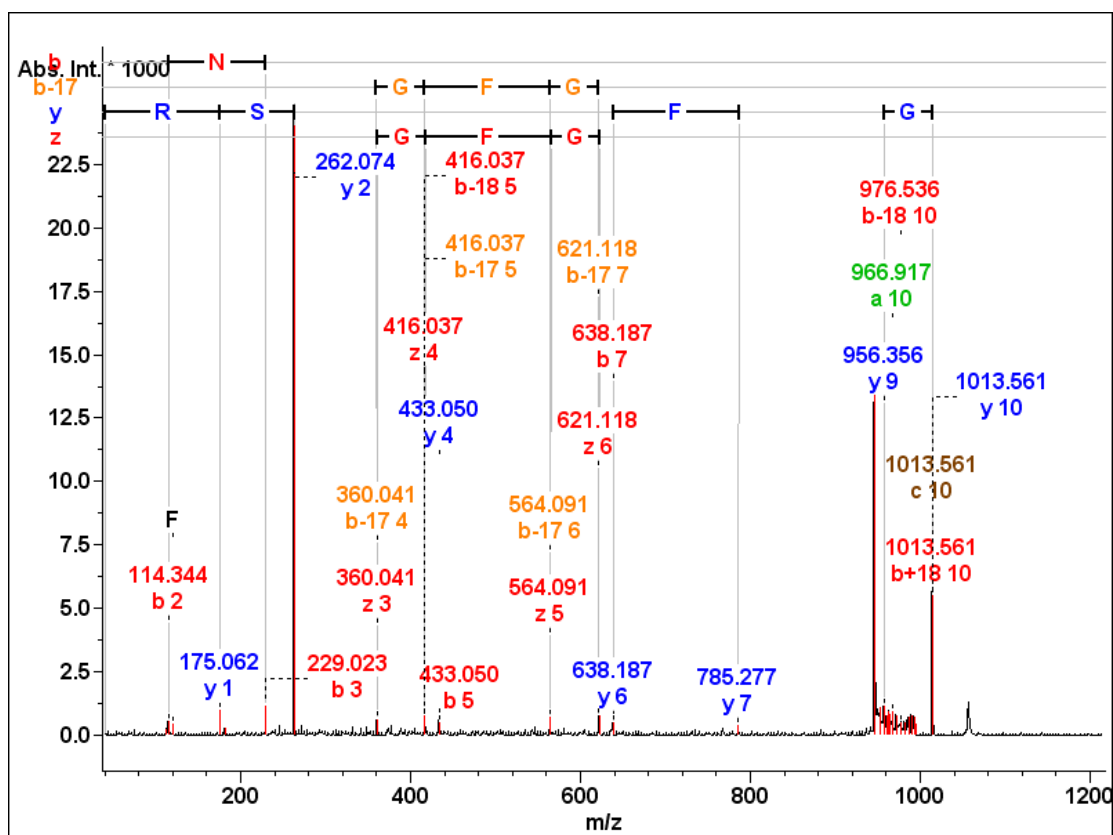

**Supplementary Figure 1.** Representative peptide sequences of identified proteins: (A) galectin-1, (B) stathmin, (C) triosephosphate isomerase, (D) peroxiredoxin-1, (E) guanine nucleotide-binding protein subunit beta-2-like 1 and (F) heterogeneous nuclear ribonucleoproteins A2/B1 through MALDI-TOF/TOF analysis.
