# Supplementary material for: Proteomic analysis of rhein-induced cyt: ER stress mediates cell death in breast cancer cells
Source: Royal Society of Chemistry journal article supplement (doi:10.1039/c4mb00451e), 2014-09-22
Supplement: c4mb00451e3.pdf [file c4mb00451e3.pdf]

| Spot No. | swiss-port No. | Gene name | Protein name                          | pI  | MW    | No. Match. Peptides | Cov. (%) | Score  | Subcellular location | Functional ontology     | matched peptides            | MCF7-Rhein / MCF7 | T test | MDAMB231-Rhein / MDAMB231 | T test  |
|----------|----------------|-----------|---------------------------------------|-----|-------|---------------------|----------|--------|----------------------|-------------------------|-----------------------------|-------------------|--------|---------------------------|---------|
| 261      | P29692         | EEF1D     | Elongation factor 1-delta             | 4.9 | 31217 | 4/11                | 20%      | 70/56  | Cytoplasm            | Translation regulation  | SIQLDGLVWGASK / LVPVGYGIR   | -1.035            | 0.015  | -1.32727                  | 0.059   |
| 760      | P18669         | PGAM1     | Phosphoglycerate mutase 1             | 6.8 | 28900 | 6/19                | 35%      | 108/56 | Cytoplasm            | Glycolysis              | HYGGLTGLNK / VLIAAHGNSLR    | -1.07             | 0.66   | -1.6524                   | 0.016   |
| 827      | Q9UC36         | HSPB1     | Heat shock protein beta-1             | 6.0 | 22826 | 4/14                | 19%      | 68/56  | Cytoplasm            | Protein folding         | LATQSNEITIPVTFESR / DWYPHSR | -1.25             | 0.18   | -1.3334                   | 0.036   |
| 1048     | P32119         | PRDX2     | Peroxiredoxin-2                       | 5.7 | 22049 | 8/14                | 36%      | 129/56 | Cytoplasm            | Redox regulation        | IGKPAPDFK / ATAVVDGAFK      | 13.041            | 0.0028 | 6.7686                    | 0.037   |
| 734      | P17931         | LGALS3    | Galectin-3                            | 8.6 | 26193 | 10/37               | 32%      | 110/56 | Secreted             | Immuno response         | LDNNWGREER / GNDVAFHFNPR    | 1.24              | 0.76   | 1.5748                    | 0.018   |
| 834      | P60174         | TPI1      | Triosephosphate isomerase             | 5.7 | 31057 | 13/47               | 46%      | 134/56 | Cytoplasm            | Glycolysis              | KFFVGGNWK / FFVGGNWK        | 1.25              | 0.67   | 1.42                      | 0.0094  |
| 987      | Q06830         | PRDX1     | Peroxiredoxin-1                       | 8.3 | 22324 | 10/29               | 44%      | 136/56 | Cytoplasm            | Redox regulation        | TIAQDYGVLK / QITVNDLPVGR    | -1.678            | 0.12   | -1.06711                  | 0.42    |
| 1251     | Q9UC61         | ppiA      | Peptidyl-prolyl cis-trans isomerase A | 7.7 | 18229 | 6/37                | 30%      | 68/56  | Cytoplasm            | Protein folding         | VSELFADK/ FEDENFILK         | 1.56              | 0.0019 | 1.978571                  | 0.00053 |
| 1232     | P23528         | CFL1      | Cofilin-1                             | 8.2 | 18719 | 7/37                | 32%      | 60/56  | Cytoplasm            | Cytoskeleton regulation | SSTPEEVKK / YALYDATYETK     | 2.0193            | 0.031  | 1.0918                    | 0.031   |

**Supplementary Table 2. Differential cysteine labeled proteins identified by ICy 2D-DIGE and MS.** Proteins displaying rhin-induced differential labeling of cysteines and lysines using ICy dyes and NHS-Cy2 dyes, respectively, were identified by MALDI-TOF peptide mass mapping. Proteins displaying an average fold-difference of  $\geq 1.3$ -fold where  $p < 0.05$  and spots matched in all images are shaded grey. <sup>a</sup>To accurately calculate rhin-induced differential labeling of cysteines in consideration of protein level alteration, the cysteine-labeling ratio was normalized using the lysine-labeling ratio. For cysteine-labeling ratio, average fold-differences of triplicate samples run on different gels from DeCyder analysis show cysteine-labeling ratios for rhin-treated *versus* untreated MCF-7 and MDA-MB-231 cells. Here, the ICy5 signal was used to monitor cysteine-labeling alterations against ICy3 signals used as an internal standard. For lysine-labeling ratio, average fold-differences of triplicate samples run on different gels from DeCyder analysis show lysine-labeling ratios for rhin-treated *versus* untreated MCF-7 and MDA-MB-231 cells. Here, the NHS-Cy2 signal was used to monitor lysine-labeling alterations against ICy3 signals used as an internal standard.
